# Supplementary material for: Strong impacts of inter-π-chain charge transfer accelerating CO 2 reduction photocatalysis of carbazole–diimine-based linear conjugated polymer/Ru complex hybrids
Source: Royal Society of Chemistry journal article supplement (doi:10.1039/d5se00142k), 2025-01-01
Supplement: d5se00142k1.pdf [file d5se00142k1.pdf]

## Supplementary Information

# **Strong impacts of inter- $\pi$ -chain charge transfer accelerating CO<sub>2</sub> reduction photocatalysis of carbazole–diimine-based linear conjugated polymer/Ru complex hybrids**

*Akinobu Nakada,<sup>a,b\*</sup> Shunsuke Asai,<sup>a</sup> Chen Zhang,<sup>a</sup> Kotaro Ishihara,<sup>a</sup> Hajime Suzuki,<sup>a</sup>*

*Osamu Tomita,<sup>a</sup> Katsuaki Suzuki,<sup>c</sup> Hironori Kaji,<sup>c</sup> Akinori Saeki,<sup>d</sup> and Ryu Abe<sup>a\*</sup>*

<sup>a</sup> Department of Energy and Hydrocarbon Chemistry, Graduate School of Engineering, Kyoto University, Nishikyo-ku, Kyoto 615-8510, Japan

<sup>b</sup> Precursory Research for Embryonic Science and Technology (PRESTO), Japan Science and Technology Agency (JST), 4-1-8 Honcho, Kawaguchi, Saitama 332-0012, Japan

<sup>c</sup> Institute for Chemical Research, Kyoto University, Uji, Kyoto 611-0011, Japan

<sup>d</sup> Department of Applied Chemistry, Graduate School of Engineering, Osaka University, 2-1 Yamadaoka, Suita, Osaka 565-0871, Japan

\*E-mail: nakada@scl.kyoto-u.ac.jp (A.N.), ryu-abe@scl.kyoto-u.ac.jp (R.A.)

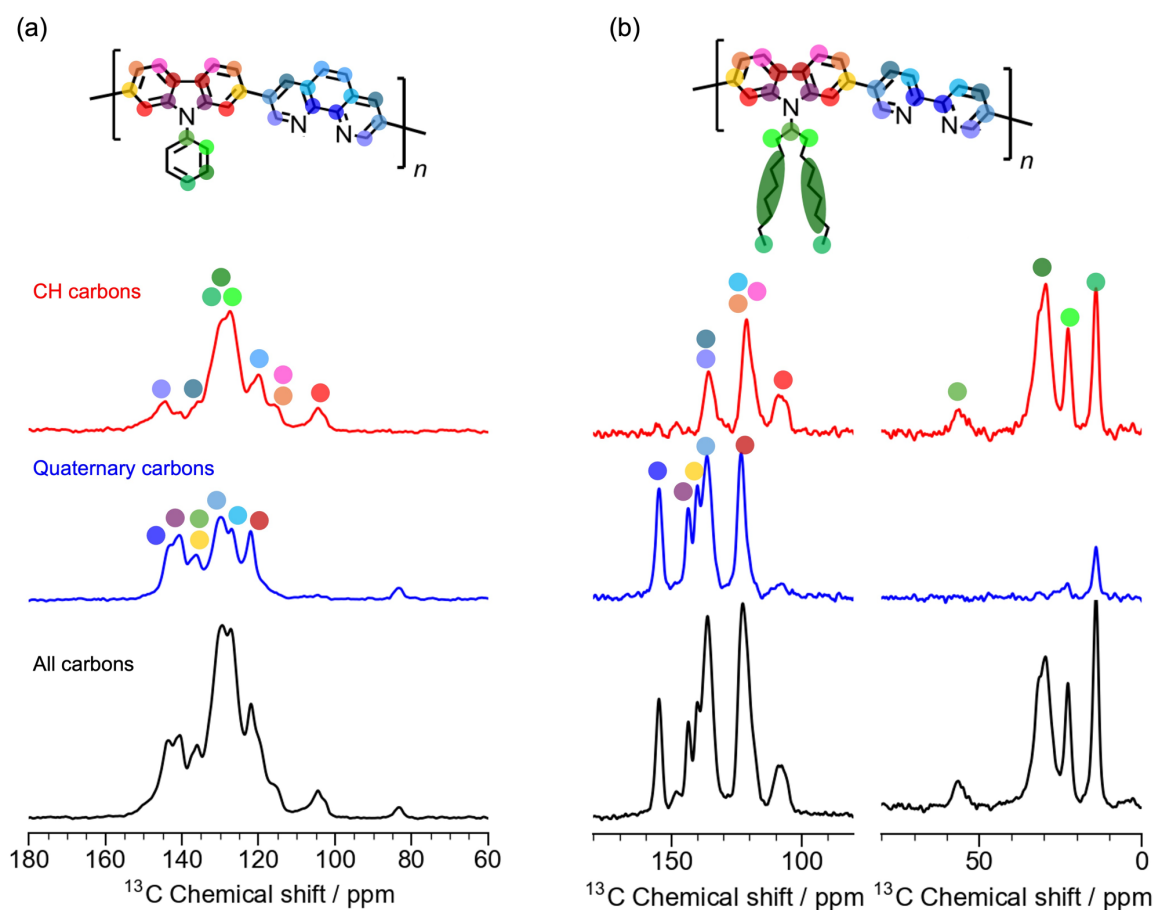

**Fig. S1** Solid-state  $^{13}\text{C}$  cross polarization/magic angle spinning (CP/MAS) spectra of (a) **[PhCz-Phen] $_n$**  and (b) **[C<sub>8,8</sub>Cz-Bpy] $_n$** . Assignments were made based on gauge-independent atomic orbital (GIAO) calculations. In the CP/MAS experiments, a  $^1\text{H}$   $90^\circ$  pulse of 3  $\mu\text{s}$  (83.3 kHz) was first applied, followed by a CP process with  $^1\text{H}$  and  $^{13}\text{C}$  field strengths of 71.4 kHz and a contact time of 4 ms. SPINAL64  $^1\text{H}$  dipolar decoupling with  $^1\text{H}$  field strength of 83.3 kHz was applied during the detection of free induction decay. The recycle delay and the MAS frequency were set to 4 s and 20 kHz, respectively. A total of 4096 transients were accumulated for each measurement. The  $^{13}\text{C}$  NMR spectra of quaternary carbons (blue) were measured selectively using the dipolar dephasing technique with a  $^1\text{H}$ – $^{13}\text{C}$  dipolar dephasing time of 1.0 ms for the aromatic region and 6.0 ms for the aliphatic region with a  $180^\circ$  pulse in the middle of the dephasing time. The spectra of CH carbons (red) were obtained by subtracting those of quaternary carbons (blue) from all carbons (black).

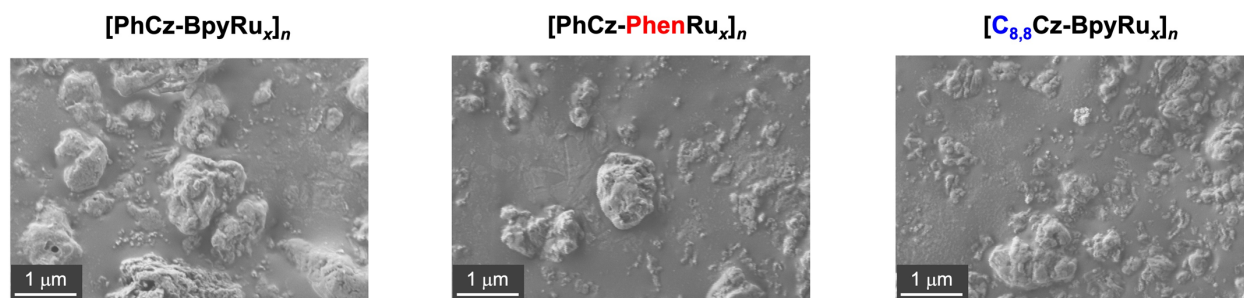

**Fig. S2** SEM images of  $[\text{PhCz-Bpy}]_n$ ,  $[\text{PhCz-Phen}]_n$ , and  $[\text{C}_{8,8}\text{Cz-Bpy}]_n$ .

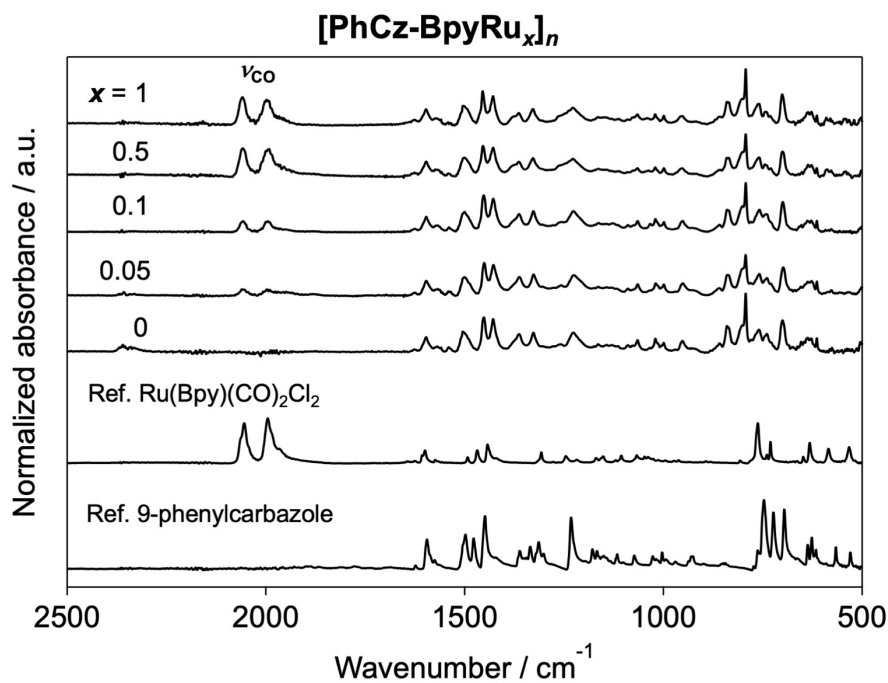

**Fig. S3** ATR-FT-IR spectra of  $[\text{PhCz-BpyRu}_x]_n$  along with reference compounds.

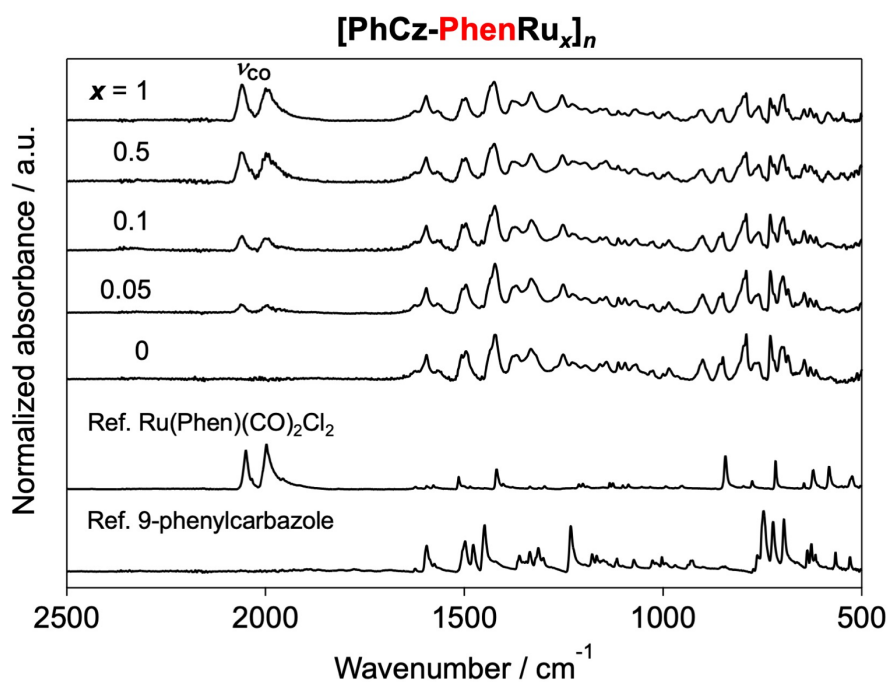

**Fig. S4** ATR-FT-IR spectra of **[PhCz-PhenRu<sub>x</sub>]<sub>n</sub>** along with reference compounds.

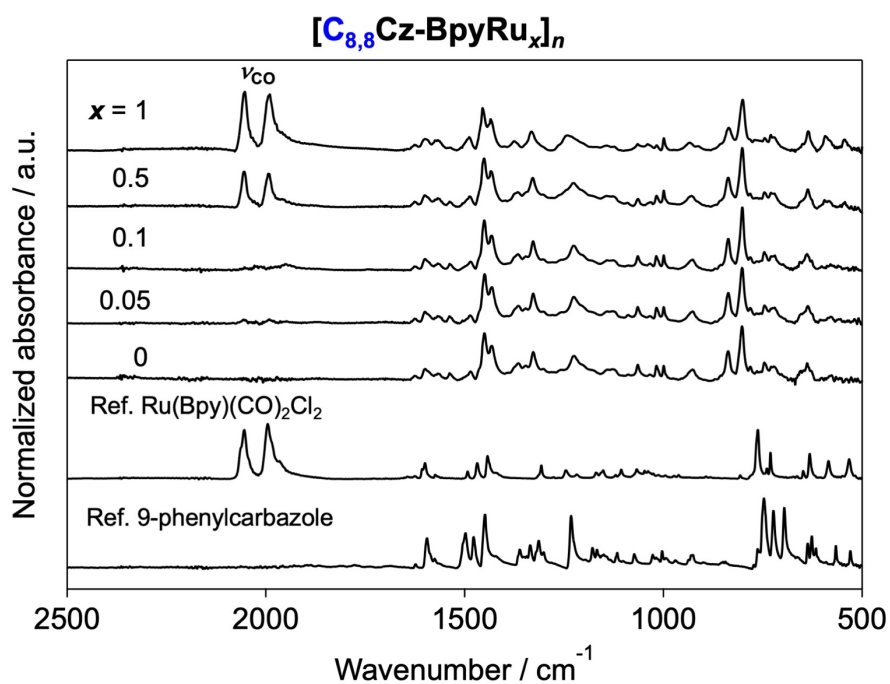

**Fig. S5** ATR-FT-IR spectra of **[C<sub>8,8</sub>Cz-BpyRu<sub>x</sub>]<sub>n</sub>** along with reference compounds.

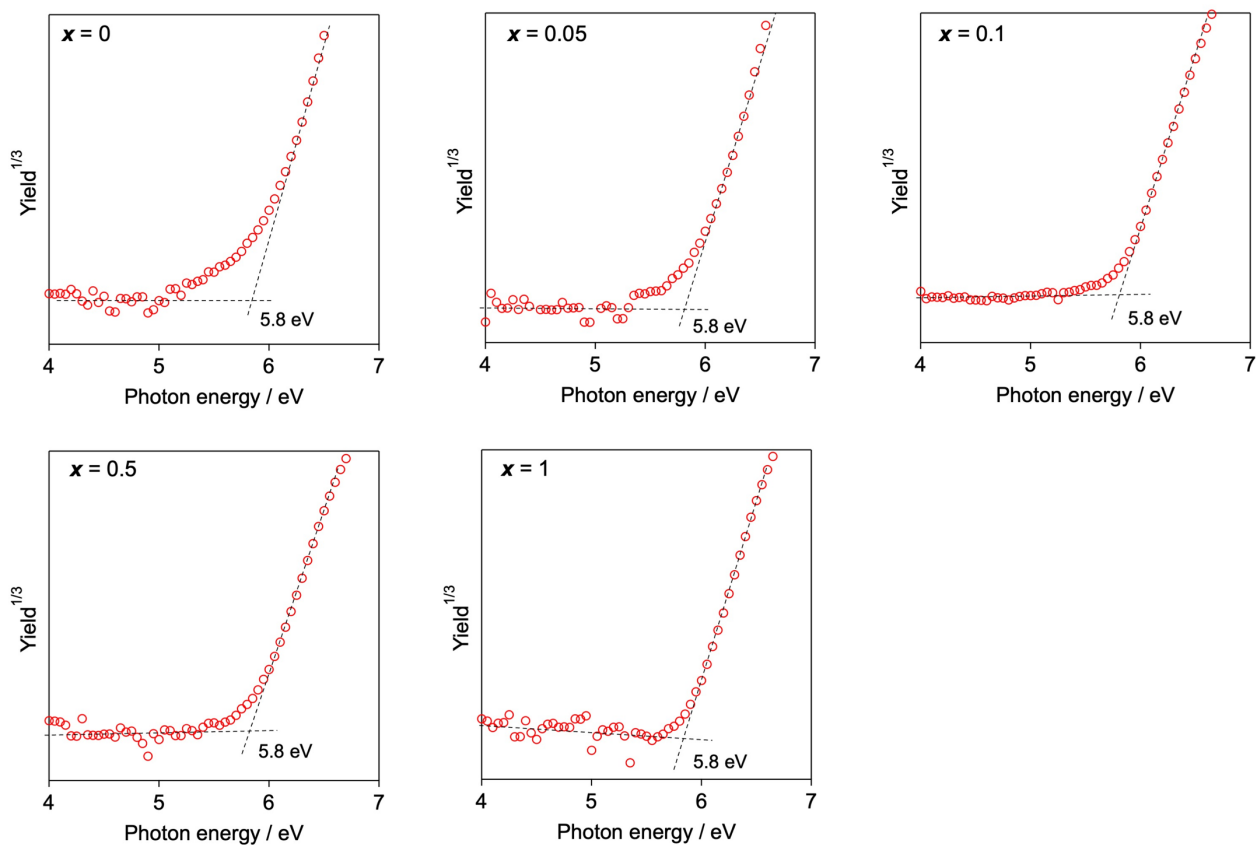

**Fig. S6** Photoelectron yield spectra of  $[\text{PhCz-BpyRu}_x]_n$ .

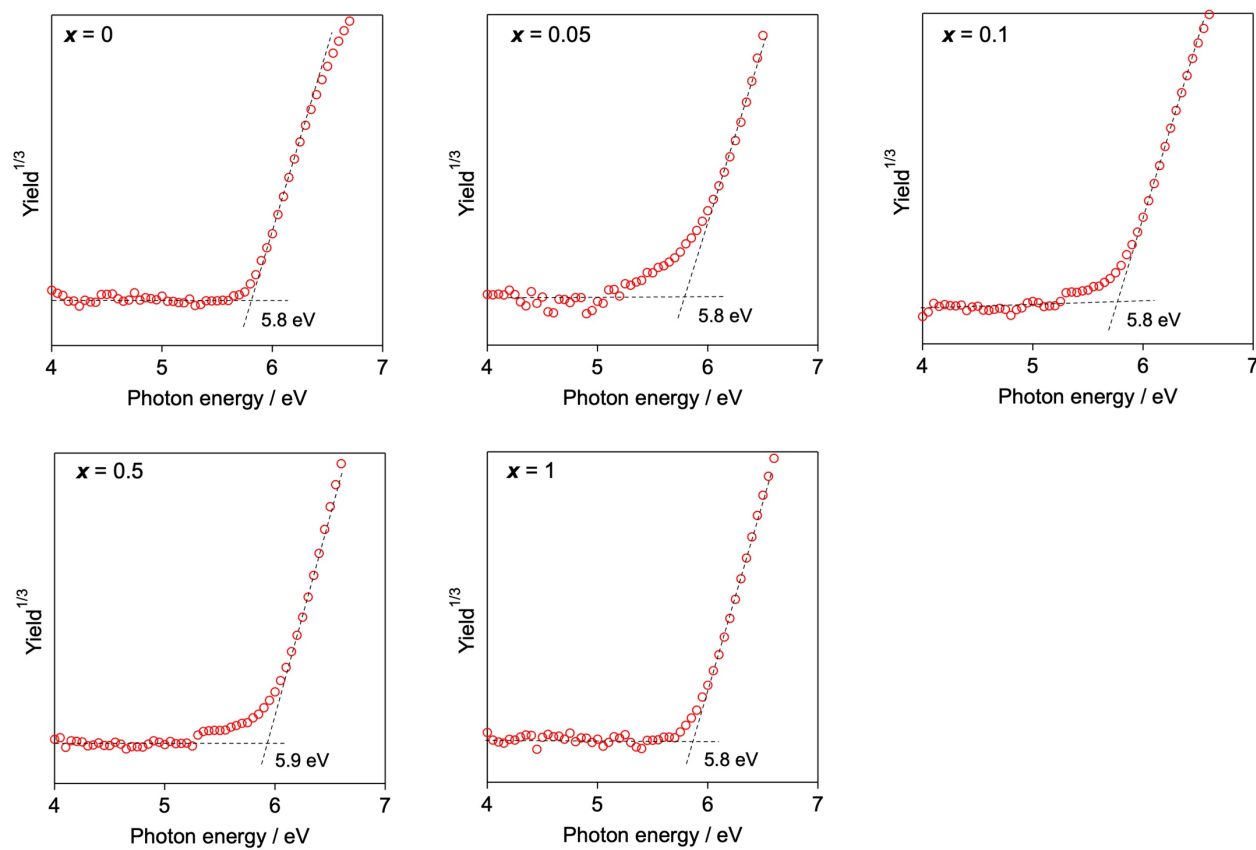

**Fig. S7** Photoelectron yield spectra of  $[\text{PhCz-PhenRu}_x]_n$ .

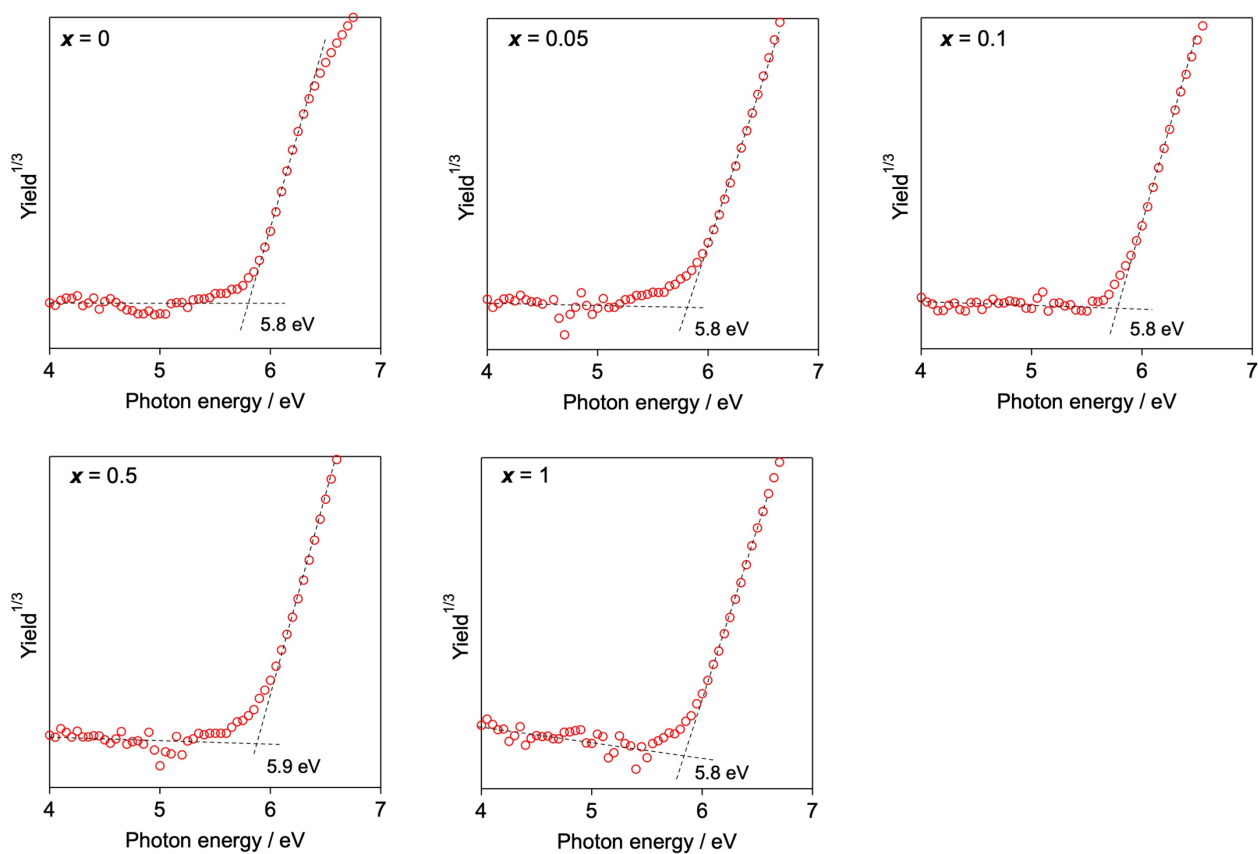

**Fig. S8** Photoelectron yield spectra of  $[\text{C}_{8.8}\text{Cz-BpyRu}_x]_n$ .

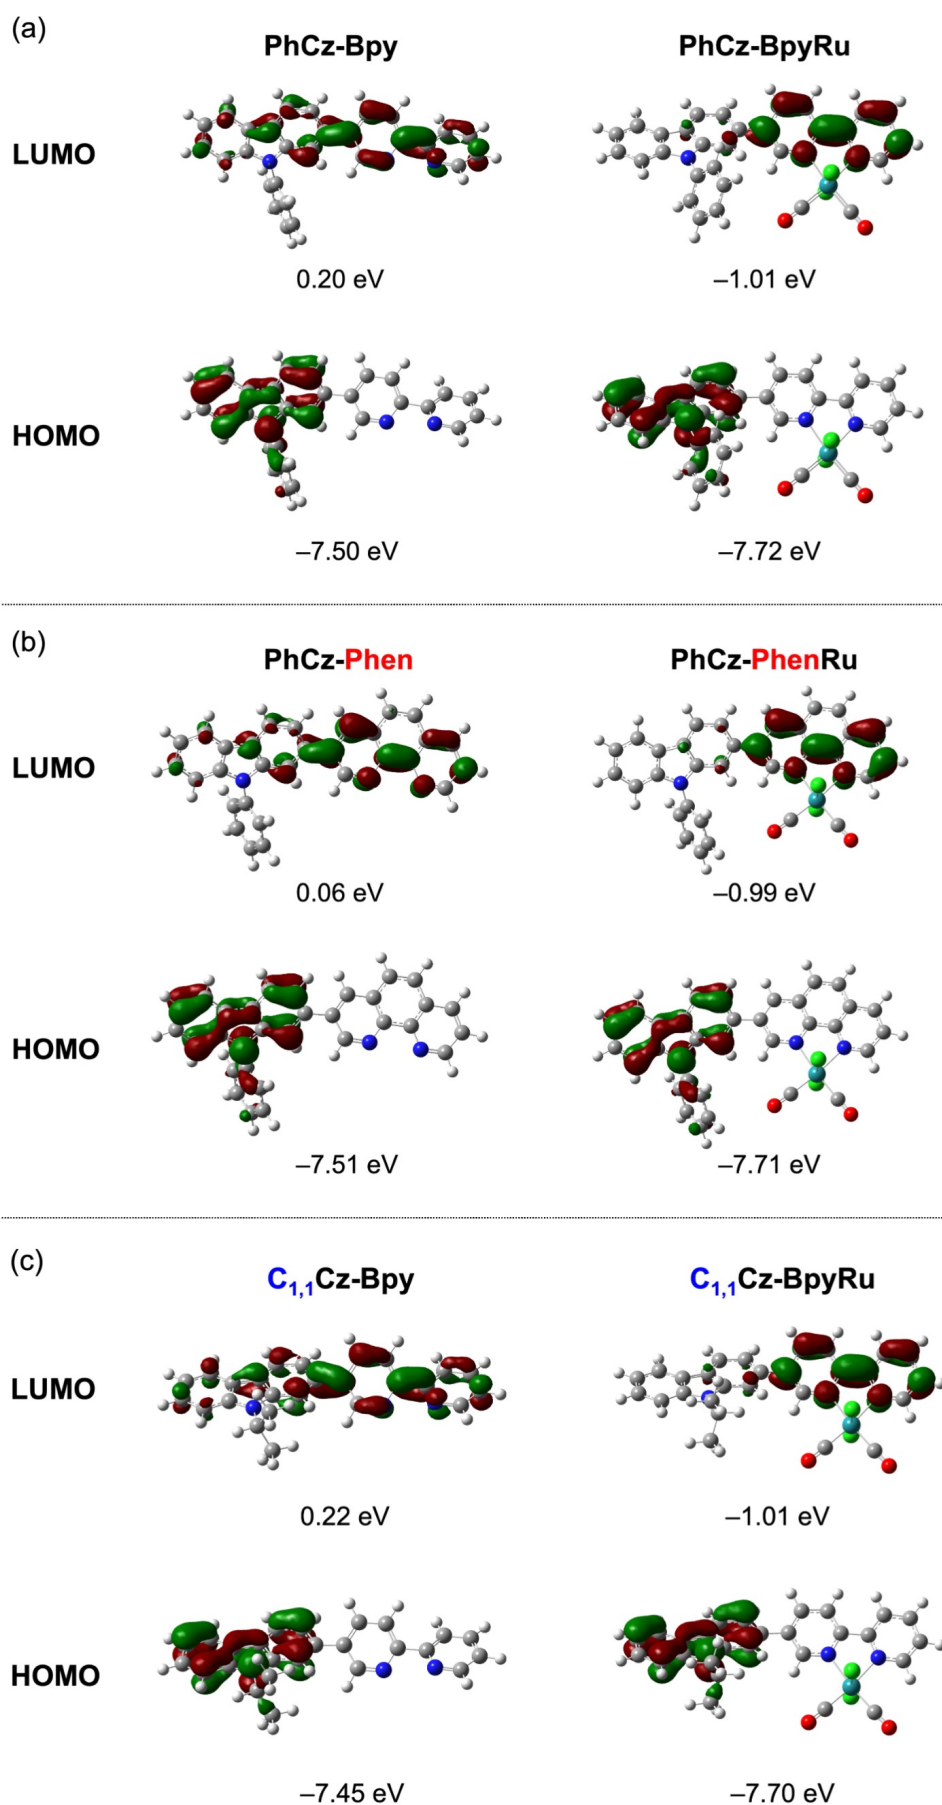

**Fig. S9** Calculated HOMO (lower) and LUMO (upper) distributions and energies of (a) **PhCz-Bpy** and **PhCz-BpyRu**, (b) **PhCz-Phen** and **PhCz-PhenRu**, (c) **C<sub>1,1</sub>Cz-Bpy** and **C<sub>1,1</sub>Cz-BpyRu**. **C<sub>1,1</sub>Cz-BpyM** was calculated as a model for **C<sub>8,8</sub>Cz-BpyM** by omitting long alkyl chains.

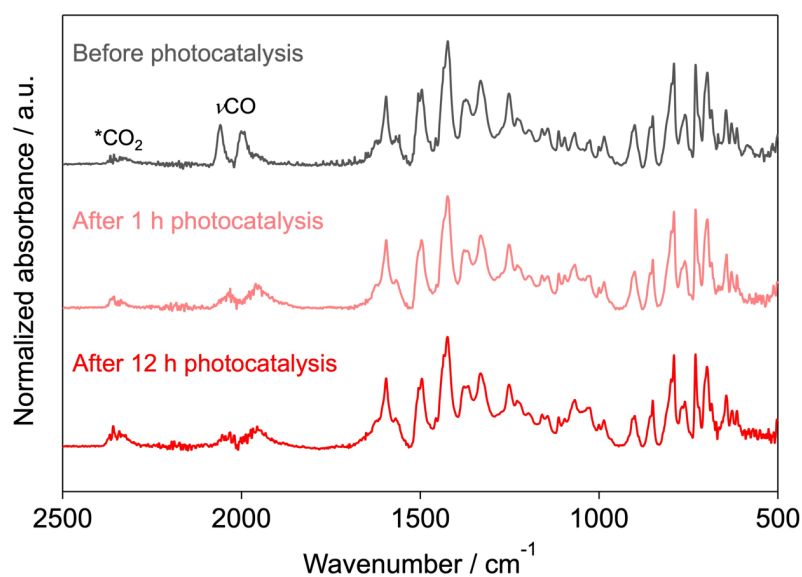

**Fig. S10** ATR-FT-IR spectra of  $[\text{PhCz-PhenRu}_{0.1}]_n$  before and after photocatalysis for 1 and 12 h.

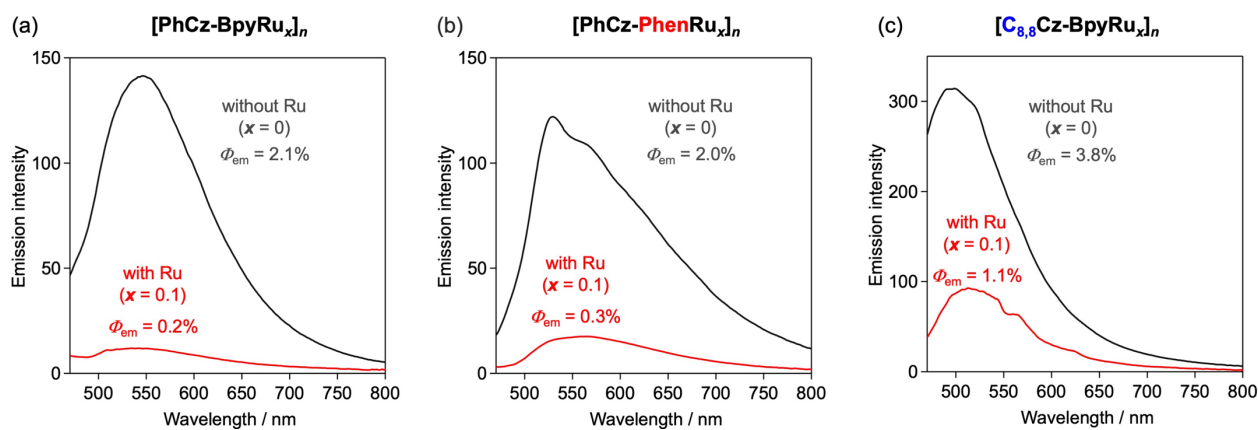

**Fig. S11** Emission spectra of (a)  $[\text{PhCz-BpyRu}_x]_n$ , (b)  $[\text{PhCz-PhenRu}_x]_n$ , and (c)  $[\text{C}_{8,8}\text{Cz-BpyRu}_x]_n$  excited at  $\lambda = 440$  nm in acetonitrile dispersion under Ar atmosphere.



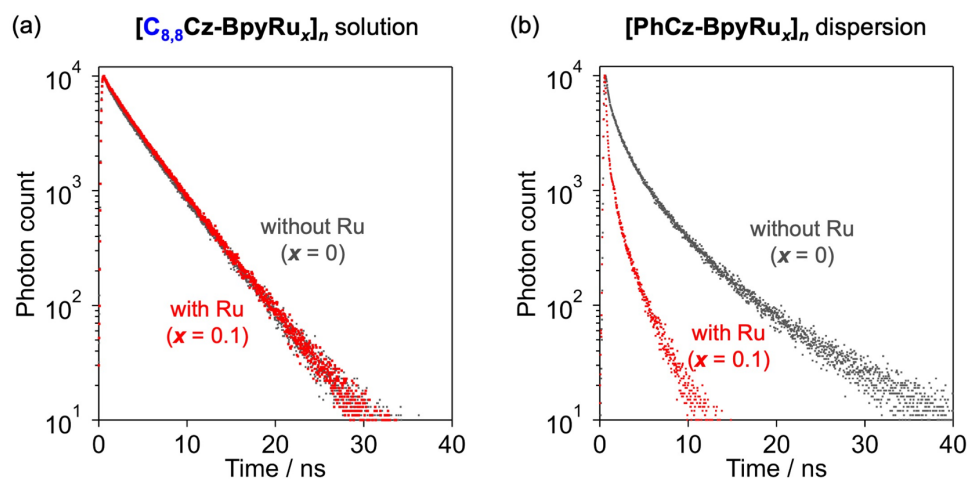

**Fig. S12** Emission decays of (a) **[C<sub>8,8</sub>Cz-BpyRu<sub>x</sub>]<sub>n</sub>** ( $x = 0$  or  $0.1$ ) in dichloromethane solution and (b) **[PhCz-BpyRu<sub>x</sub>]<sub>n</sub>** ( $x = 0$  or  $0.1$ ) in dichloromethane dispersion excited at  $\lambda = 440$  nm under Ar atmosphere.
